# Supplementary material
Source: Springer Nature journal article supplement (https://www.springermedizin.de/resource/supplementary/12947_2010_359_MOESM1_ESM.pdf/9556816)

P. C., male, 18 y

Chest pain +++

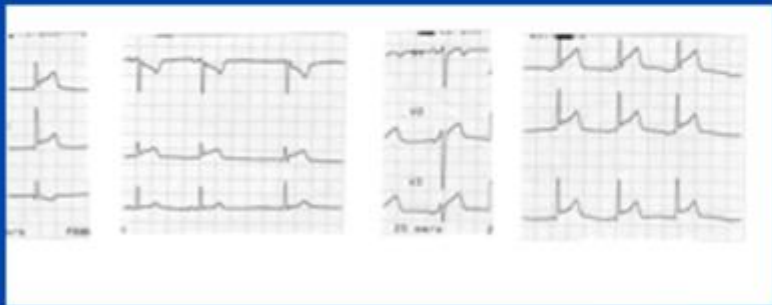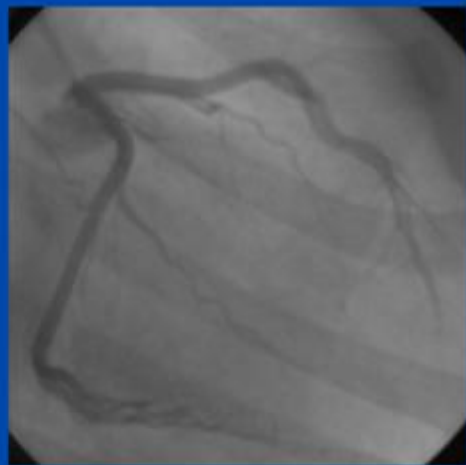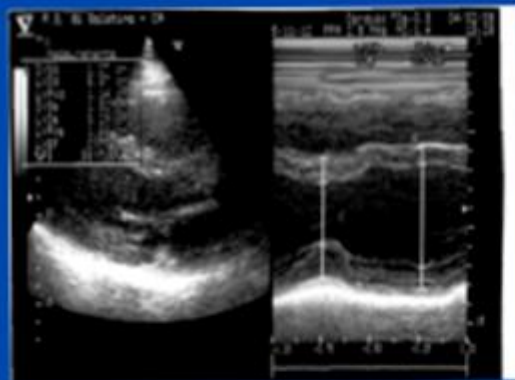

Tp I = 2,6 ng/ml

22.1.2008

Supplement: MOESM1 [file 9556816]
